# Supplementary material for: Fraction of Exhaled Nitric Oxide (FeNO) Norms in Healthy Tunisian Adults
Source: Biomed Res Int. 2014 Jun 3;2014:269670. doi: 10.1155/2014/269670 (PMC4065671; doi:10.1155/2014/269670)
Supplement: Supplementary file 1 — The supplementary Material contains the following sections. The section Methods includes detailed information about the study design (especially recruitment method), and the published FeNO norms for Saudi Arabian males. The section Results contains four figures (distribution of the healthy total sample by sex and age range, measured FeNO in subgroups of healthy adults', according to age, height and weight ranges; comparison, for the same age range, of measured and predicted (after adjustment values) FeNO determined from Saudi Arabian norms; and measured FeNO values of the equation and validation groups according to height). It also includes four tables (FeNO norms for Arab populations; description of the applied non-inclusion criteria; healthy adults' plethysmographic data and comparison between the equation and validation groups' data). The section Discussion includes discussion of subject's data, inclusion of additional significant FeNO influencing factors and an attempt to answer the following question: what do “abnormal” FeNO values reflect? [file 269670.f1.zip]

Archive with 2 entries (1 files):
- 269670.f1/
- 269670.f1/Supplementary_Data_R1_2738_911454.docx
