# Supplementary material for: Fraction of Exhaled Nitric Oxide (FeNO) Norms in Healthy Tunisian Adults
Source: Biomed Res Int. 2014 Jun 3;2014:269670. doi: 10.1155/2014/269670 (PMC4065671; doi:10.1155/2014/269670)
Supplement: Supplementary file 2 [file 269670.f2.zip]

Archive with 5 entries (4 files):
- 269670.f2/
- 269670.f2/Figure_1_Supplementary_data_2738_931348.pptx
- 269670.f2/Figure_2_ABC_Supplementary_Data_2738_931346.pptx
- 269670.f2/Figure_3_ABC_supplementary_Data_2738_931345.pptx
- 269670.f2/Figure_4_supplementary_data_2738_931350.pptx
